# Supplementary material for: Decorated networks of native proteins: nanomaterials with tunable mesoscopic domain size
Source: Royal Society of Chemistry journal article supplement (doi:10.1039/d0sm02269a), 2021-01-01
Supplement: d0sm02269a1.pdf [file d0sm02269a1.pdf]

## Supplementary Information

### Decorated Networks of Native Proteins: Nanomaterials with Tunable Mesoscopic Domain Size

**Fig. S1** Protein precipitation using different concentrations of  $\text{YCl}_3$ . Both proteins retained their fluorescence upon salt addition. Upper row shows eGFP gels, whereas bottom row shows few aggregates formed with native mCherry. Scale bars are 10  $\mu\text{m}$  and 25  $\mu\text{m}$  for eGFP and mCherry, respectively.

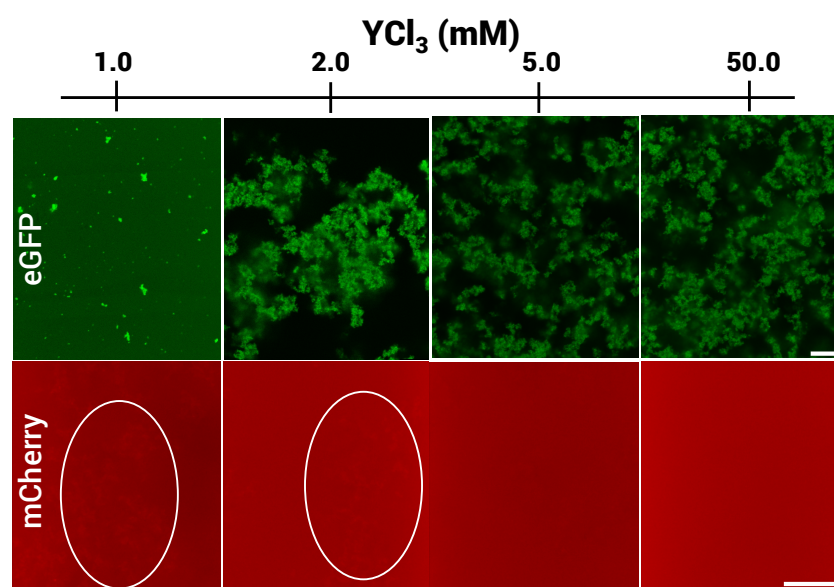

**Fig. S2** Precipitation of cationised mCherry. (a) No precipitation is observed when using  $\text{YCl}_3$ . (b) The protein gels readily without losing its fluorescence when 3 M of ammonium sulphate is added. Scale bars are 7.5  $\mu\text{m}$  and 10  $\mu\text{m}$  for (a) and (b), respectively.

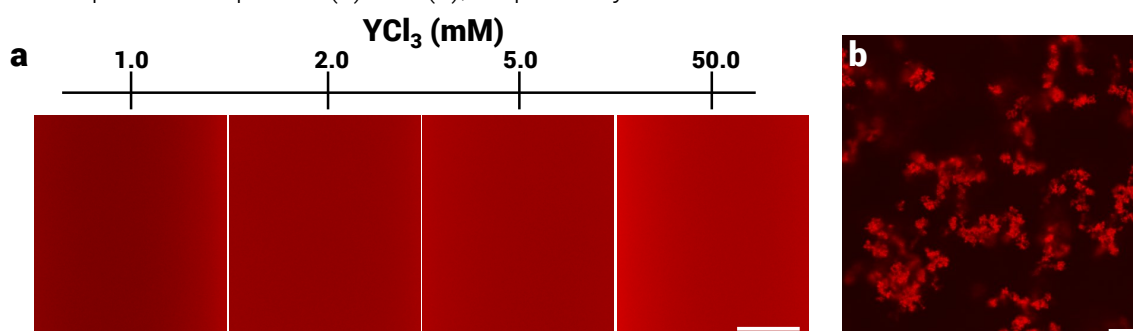

**Fig. S3** Thermal denaturation curves for cationised mCherry as a function of temperature. The level 1 mL of protein folding (0.08 mg/mL) was monitored via the emission of the chromophore excited at 587 nm whilst increasing the temperature using a Cary Eclipse Fluorescence Spectrophotometer (Agilent Technologies) fitted with a Peltier thermoelectric bath. Before each measurement, the temperature was allowed to equilibrate for 5 min.

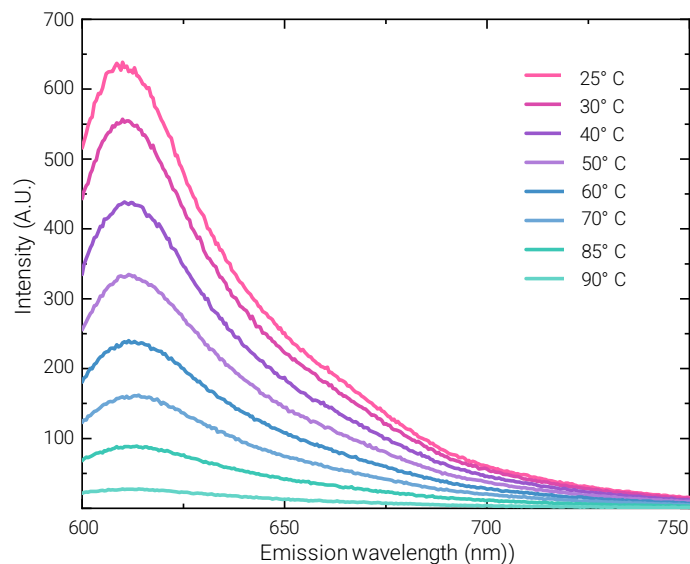

**Fig. S4** Confocal image of an eGFP gel after the addition of 5 mM yttrium chloride followed by 3 M of ammonium sulphate. The gel structure shown is comparable to the correspondent one shown in Fig. 3 b in the main text and in Fig. S1. Scale bar is 10  $\mu$ m.

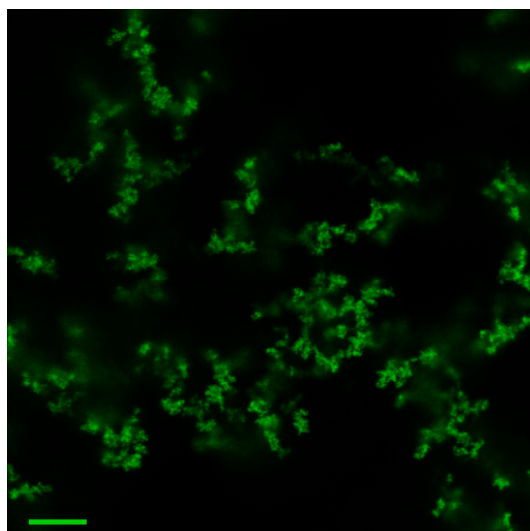

**Fig. S5** One-step bicontinuous gels formation through the addition of different amounts of ammonium sulphate to a 1:1 mixture of eGFP (green) and mCherry (red). The top images are an overlay of the channels. No precipitation is observed at 1 M of the salt, concentration after which small clusters of only eGFP are observed. However at 1.6 M we start seeing mCherry co-precipitation and deposition (individual protein panels). At 1.8 M all eGFP has fully precipitated (black background on eGFP individual channel) and mCherry does it by 3 M of ammonium sulphate. The binary gels are formed by a mixture of both proteins. The circled regions highlight the structures found.

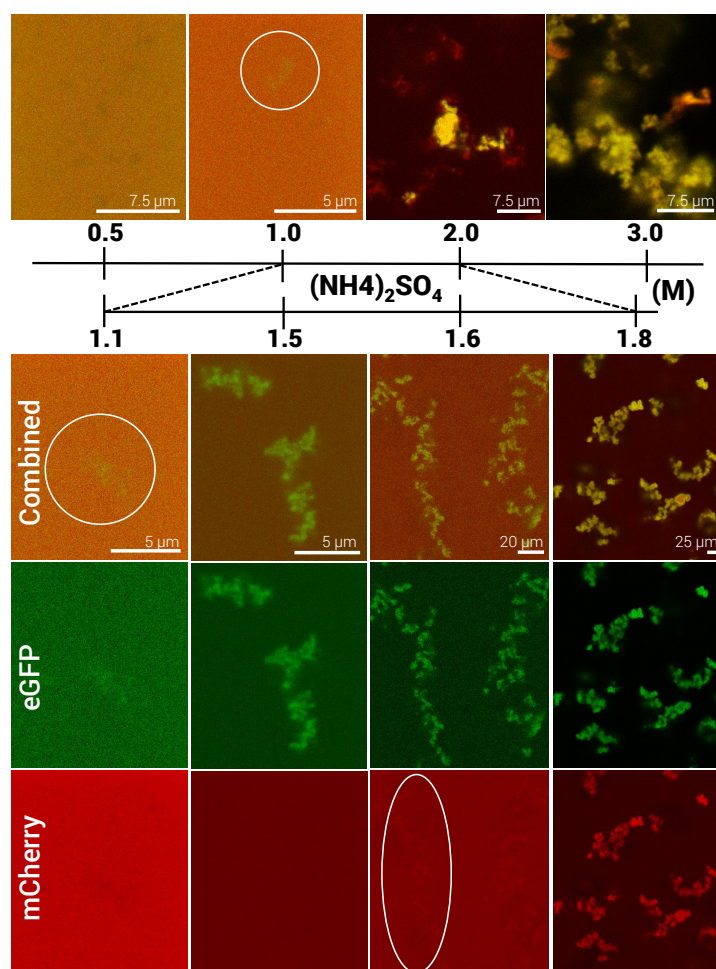

**Table I.** Parameters used and obtained from SASView [1] fitting using a Cylinder + Orstein-Zernicke form and structure factor, respectively

| eGFP                     |            |                  |            |                  |                               |                 |                  |
|--------------------------|------------|------------------|------------|------------------|-------------------------------|-----------------|------------------|
| [YCl <sub>3</sub> ] (mM) | Radius (Å) | Error Radius (Å) | Length (Å) | Error length (Å) | Correlation length, $\xi$ (Å) | Error $\xi$ (Å) | Fitting $\chi^2$ |
| No salt                  | 20.45      | 0.08             | 82.29      | 0.77             | 23.48                         | 0.80            | 1.19             |
| 0.1                      | 29.66      | 0.08             | 74.92      | 0.70             | 18.53                         | 0.89            | 1.09             |
| 0.25                     | 19.47      | 0.08             | 74.80      | 0.71             | 189.14                        | 96.99           | 1.25             |
| 0.5                      | 18.77      | 0.07             | 132.79     | 1.47             | 246.43                        | 31.97           | 1.85             |
| 0.75                     | 18.32      | 0.06             | 221.05     | 3.42             | 245.99                        | 27.22           | 1.86             |

eGFP Scattering Light Density =  $1.894 \times 10^{-6} \text{ A}^{-2}$  calculated from [2]

**Table II.** Parameters used and obtained from SASView [1] fitting using a Cylinder Form Factor

| Cationised mCherry                                     |            |                  |            |                  |                  |
|--------------------------------------------------------|------------|------------------|------------|------------------|------------------|
| [(NH <sub>4</sub> ) <sub>2</sub> SO <sub>4</sub> ] (M) | Radius (Å) | Error Radius (Å) | Length (Å) | Error length (Å) | Fitting $\chi^2$ |
| No salt                                                | 18.96      | 0.09             | 51.40      | 1.32             | 1.44             |
| 0.5                                                    | 16.03      | 0.47             | 54.90      | 2.11             | 1.29             |
| 0.75                                                   | 16.18      | 0.57             | 54.24      | 2.59             | 1.26             |
| 1                                                      | 12.80      | 0.71             | 57.85      | 2.51             | 1.44             |
| 1.5                                                    | 15.34      | 0.21             | 109.3      | 7.00             | 1.42             |

mCherry Scattering Light Density =  $1.906 \times 10^{-6} \text{ A}^{-2}$  calculated from [2]

**Table III.** Comparison between the surface groups and  $\zeta$ -Potential of eGFP and mCherry

| Protein            | Acidic Groups <sup>a</sup> | Cystein Residues | Other residues                                                    | native $\zeta$ -Potential <sup>b</sup> (mV) | $\zeta$ -Potential cationisation <sup>b</sup> (mV) |
|--------------------|----------------------------|------------------|-------------------------------------------------------------------|---------------------------------------------|----------------------------------------------------|
| native eGFP [3]    | 32                         | 2                | 2x Ca <sup>2+</sup><br>1x SO <sub>4</sub> <sup>2-</sup><br>4x PEG | -7.02                                       | --                                                 |
| native mCherry [4] | 33                         | 0                | 0                                                                 | -7.0                                        | +9.3                                               |

<sup>a</sup> Total number of glutamic and aspartic

<sup>b</sup> Obtained at pH = 7.4

## References

[1] SasView [www.sasview.org](http://www.sasview.org)

[2] Biomolecular Scattering Length Density Calculator (2019, June) retrieved from <http://psldc.isis.rl.ac.uk/Psldc/>

[3] Arpino, J.A., Rizkallah, P.J., Jones, D.D., Crystal structure of enhanced green fluorescent protein to 1.35 Å resolution reveals alternative conformations for Glu222, *PLoS One*, **7**, e47132 (2012).

[4] Shu, X., Shaner, N. C., Yarbrough, C. A., Tsien, R. Y., Remington, S. J., Novel chromophores and buried charges control color in mGruits, *Biochemistry*, **45**, 9639-9647 (2006).
